# Supplementary material for: Serological Assays for Assessing Postvaccination SARS-CoV-2 Antibody Response
Source: PubMed Central journal article supplement (PMC8557923; doi:10.1128/spectrum.00733-21), 2021-09-29
Supplement: spectrum00733-21_supp_1_seq7.pdf [file spectrum00733-21_supp_1_seq7.pdf]

**Table S1: Details of the six commercial serological assays**

| Assays (Type)                              | Method | Manufacturer | Isotype and antibody | Target protein                    | Run time (mins) | Manufacturer's claim of sensitivity | Manufacturer's claim of Specificity |
|--------------------------------------------|--------|--------------|----------------------|-----------------------------------|-----------------|-------------------------------------|-------------------------------------|
| Genscript cPass (Qualitative test)         | ELISA  | Genscript    | IgG – NAB            | RBD unit of S1                    | 180             | 93.8%                               | 99.4%                               |
| Diasorin-S1/S2 IgG (Quantitative Test)     | CLIA   | Diasorin     | IgG-total Ab         | S1/S2                             | 35              | 93.9%- 99.5%                        | 98.6% - 99.7%                       |
| Alinity IgG II (Quantitative Test)         | CMIA   | Abbott       | IgG-total Ab         | RBD unit of S1                    | 20              | 89.9%- 99.7%                        | 99.2%-99.8%                         |
| Diasorin-TrimericS IgG (Quantitative Test) | CLIA   | Diasorin     | IgG-total Ab         | Trimeric SARS-CoV-2 spike protein | 20              | 94.5%-99.6%                         | 99.0%-99.7%                         |
| Roche Elecsys (Quantitative Test)          | CLIA   | Roche        | IgG & IgM-total Ab   | RBD unit of S1                    | 20              | 99.91 % -100%                       | 98.1-99.3 %                         |
| AESKULISA (Quantitative test)              | ELISA  | AESKU        | IgG-total Ab         | S1                                | 180             | 95.2 %                              | > 99 %                              |

**Table S2: Results of six commercially available serological assays.**

| Assay                  |          | PRNT     |          | Total |
|------------------------|----------|----------|----------|-------|
|                        |          | Positive | Negative |       |
| Genscript cPass        | Positive | 49       | 3        | 125   |
|                        | Negative | 20       | 53       |       |
| Diasorin-S1/S2 IgG     | Positive | 40       | 3        | 104   |
|                        | Negative | 13       | 48       |       |
| Alinity IgG II         | Positive | 52       | 15       | 104   |
|                        | Negative | 1        | 36       |       |
| Diasorin-TrimericS IgG | Positive | 45       | 5        | 103   |
|                        | Negative | 8        | 45       |       |
| Roche Elecsys          | Positive | 48       | 28       | 96    |
|                        | Negative | 0        | 20       |       |
| AESKULISA              | Positive | 48       | 13       | 99    |
|                        | Negative | 4        | 34       |       |

**Table S3: Area under the curve (AUC) for the serological assays**

| Antibody tests         | AUC   | 95% Confidence Interval |
|------------------------|-------|-------------------------|
| Genscript cPass        | 0.939 | (0.888 - 0.990)         |
| Diasorin-S1/S2 IgG     | 0.935 | (0.885 - 0.986)         |
| Alinity IgG II         | 0.860 | (0.784 - 0.936)         |
| Diasorin-TrimericS IgG | 0.953 | (0.912 - 0.994)         |
| Roche Elecsys          | 0.839 | (0.751 - 0.927)         |
| AESKULISA              | 0.928 | (0.871 - 0.984)         |

**Table S4: Comparing AUC from the ROC curves**

|                       | <i>Genscript</i> | <i>Diasorin</i> | <i>Alinity</i> | <i>Diasorin-</i> | <i>Roche</i>   | <i>AESKULISA</i> |
|-----------------------|------------------|-----------------|----------------|------------------|----------------|------------------|
|                       | <i>cPass</i>     | <i>S1/S2</i>    | <i>IgG II</i>  | <i>TrimericS</i> | <i>Elecsys</i> |                  |
|                       |                  | <i>IgG</i>      |                | <i>IgG</i>       |                |                  |
| <i>Genscript</i>      | 0.901            | 0.044*          | 0.644          | 0.016*           | 0.742          |                  |
| <i>cPass</i>          |                  |                 |                |                  |                |                  |
| <i>Diasorin-S1/S2</i> |                  | 0.075           | 0.574          | 0.031*           | 0.843          |                  |
| <i>IgG</i>            |                  |                 |                |                  |                |                  |
| <i>Alinity IgG II</i> |                  |                 | 0.022*         | 0.678            | 0.117          |                  |
| <i>Diasorin-</i>      |                  |                 |                | 0.008*           | 0.453          |                  |
| <i>TrimericS IgG</i>  |                  |                 |                |                  |                |                  |
| <i>Roche Elecsys</i>  |                  |                 |                |                  | 0.052          |                  |
| <i>AESKULISA</i>      |                  |                 |                |                  |                |                  |

\* p<0.05

**Table S5: Cohen's Kappa coefficient for agreement with PRNT results**

| <b>Serological assays</b> | <b>Cohen's Kappa coefficient</b> |
|---------------------------|----------------------------------|
| Genscript cPass           | 0.638*                           |
| Diasorin-S1/S2 IgG        | 0.693*                           |
| Alinity IgG II            | 0.691*                           |
| Diasorin-TrimericS IgG    | 0.750*                           |
| Roche Elecsys             | 0.406*                           |
| AESKULISA                 | 0.652*                           |

\* p<0.001
